# Supplementary material for: CIITA promoter polymorphism impairs monocytes HLA-DR expression in patients with septic shock
Source: PubMed Central journal article supplement — iScience. 2022 Oct 6;25(11):105291. doi: 10.1016/j.isci.2022.105291 (PMC9593818; doi:10.1016/j.isci.2022.105291), 2022-10-06

iScience, Volume 25

## **Supplemental information**

**CIITA promoter polymorphism**

**impairs monocytes HLA-DR**

**expression in patients with septic shock**

**Jordi Miatello, Anne-Claire Lukaszewicz, Michael J. Carter, Valérie Faivre, Stéphane Hua, Kim Z. Martinet, Christine Bourgeois, Lluís Quintana-Murci, Didier Payen, Michele Boniotto, and Pierre Tissières**

**Table S1. Primer sequences. Related to STAR Methods.**

Primer sequences are expressed as 5' to 3'; f, forward primer; r, reverse primer.

| <b>Assay</b>        | <b>Name</b>                   | <b>Sequence</b>                                          |
|---------------------|-------------------------------|----------------------------------------------------------|
| SNP genotyping      | CIITA-P3 SNP-712 Taqman probe | ATGGGAGTCAGTATTATTTAGCATC[A/G]CTTTGGCGGGTCACCCCAAACCATC  |
|                     | CIITA-P3 SNP-286 Taqman probe | GAAGTGAAATTAATTTTCAGAGGTGT[A/G]GGGAGGGCTTAAGGGAGTGTGGTAA |
| QPCR CIITA isoforms | Promoter1 f                   | CATGGTGGCAGCTCAC                                         |
|                     | Promoter3 f                   | CCCAAGGCAGCTCACA                                         |
|                     | Promoter4 f                   | GAACAGCGGCAGCTCA                                         |
|                     | Exon2 r                       | GTAGCCACCTTCTAGGG                                        |
|                     | HuRPLP03 f                    | AGGCTTTAGGTATCACCACTAA                                   |
|                     | HuRPLP03 r                    | ACATCACTCAGGATTTCAATGG                                   |

**Figure S1. Study flowchart according to STROBE. Related to Results.**

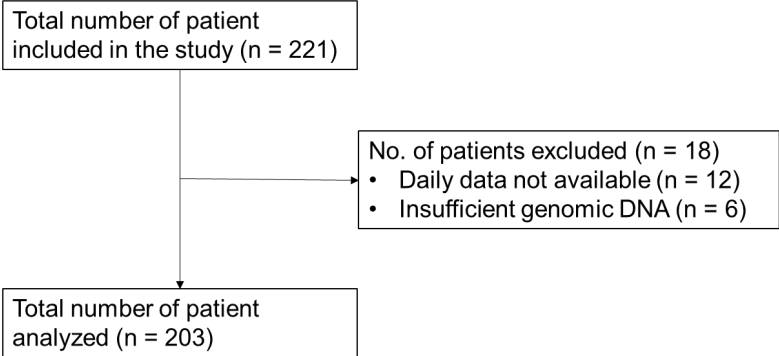

**Figure S2. Ex vivo HLA-DR expression in monocytes of healthy controls. Related to Figure 2.** Results are presented as median with 95% CI and by genotype of CIITA G-712A\*rs12596540 and G-286A\*rs3087456 in a co-dominant model. P values were calculated using Mann-Whitney Test. \*\*\*\* P < 0.0001, \*\* P < 0.01 and \* P < 0.05.

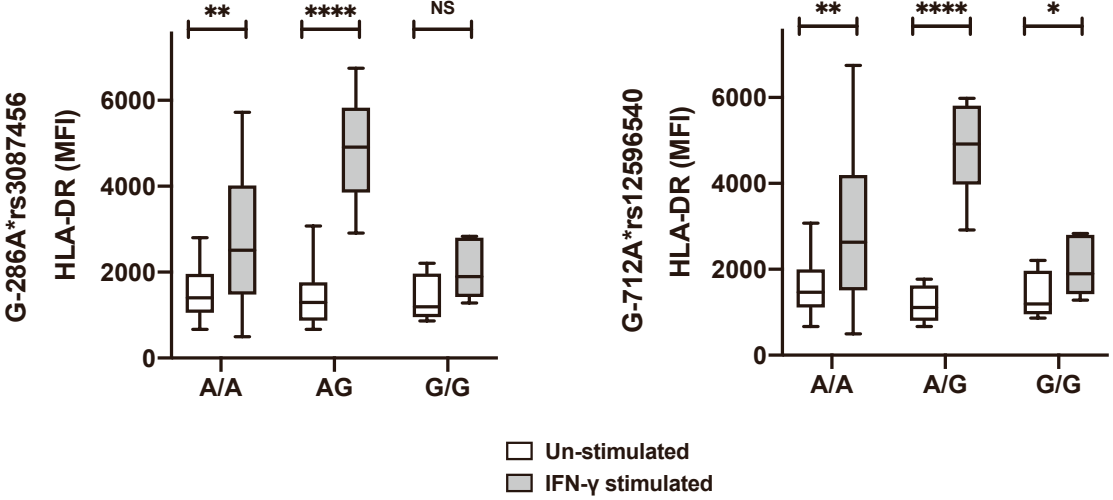

Supplement: mmc1.pdf [file mmc1.pdf]
